# Supplementary material
Source: HighWire-hosted journal article supplement (https://ajnr-sso.highwirestaging.com/highwire/filestream/104761/field_highwire_adjunct_files/0/0230.pdf)
Supplement: 0230.pdf [file 0230.pdf]

# Clinical outcomes and safety comparison of vertebroplasty, balloon kyphoplasty, and vertebral implant for treatment of vertebral compression fractures

## Online Materials

Taibo Li, Sharon Pang, Ryan England, Anna Gong, David Botros, Sasicha Manupipatpong, Ferdinand K. Hui, Majid Khan

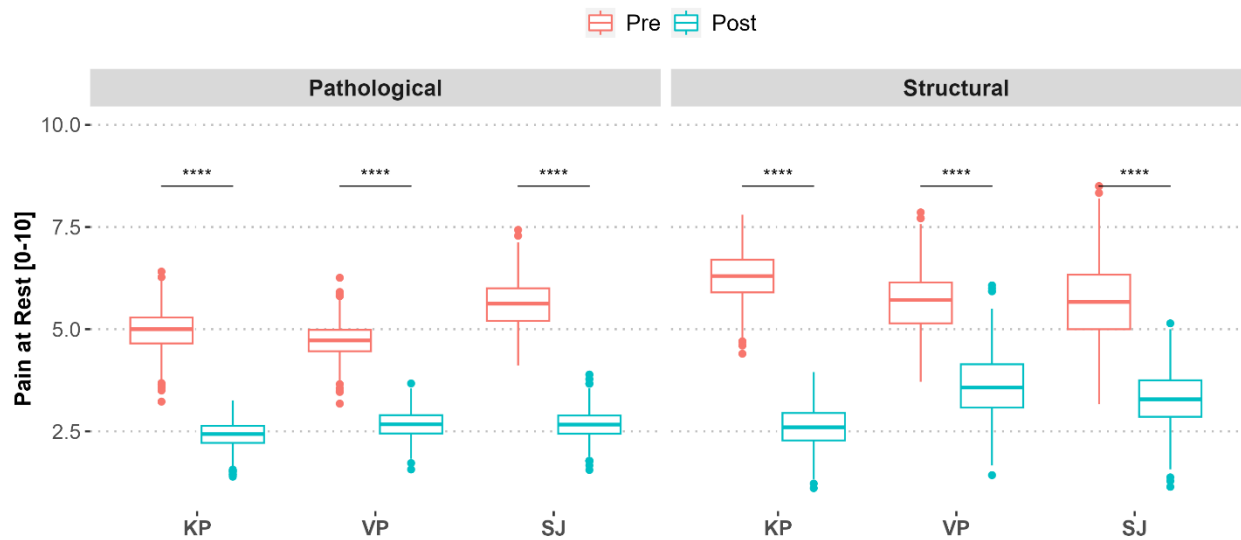

**Figure S1: Sub-Analysis of Pain Score Comparison At Rest by Underlying Pathology.** Distribution of patient-reported pain scores on a scale between 0–10 at rest for three procedure types pre- (red) and post-procedure (blue), split by underlying pathology (pathological fracture, left; structural fractures right). Shown are median and interquartile ranges. KP, kyphoplasty; VP, vertebroplasty; SJ, SpineJack vertebral implant.

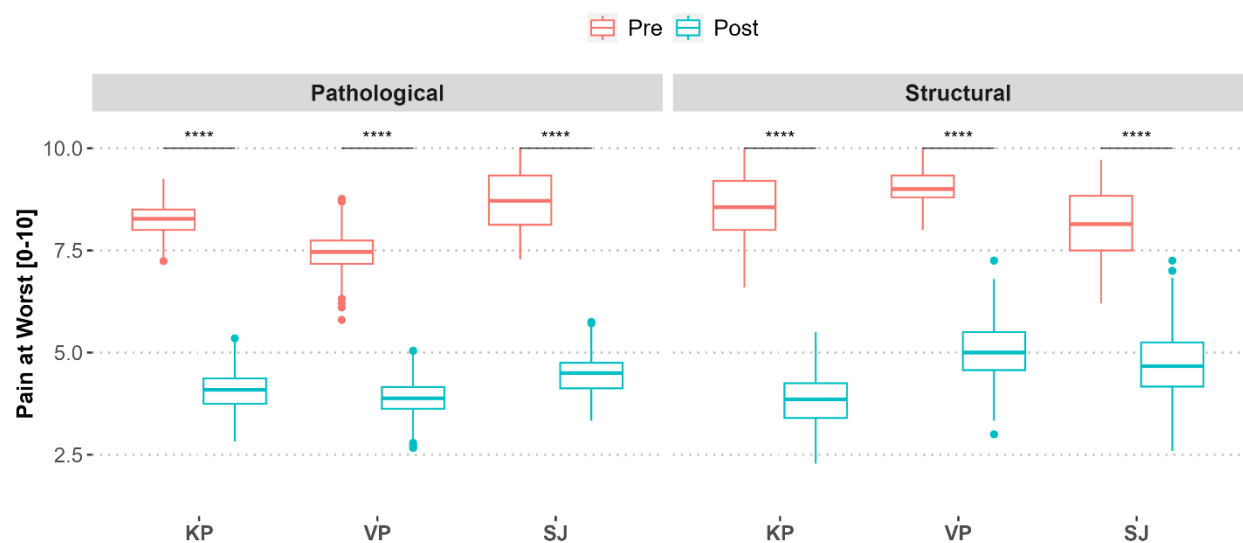

**Figure S2: Sub-Analysis of Pain Score Comparison At Worst by Underlying Pathology.** Distribution of patient-reported pain scores on a scale between 0–10 for three procedure types pre- (red) and post-procedure (blue), split by underlying pathology (pathological fracture, left; structural fractures right). This is the same analysis as Figure S1 except for pain scores at worst. Shown are median and interquartile ranges. KP, kyphoplasty; VP, vertebroplasty; SJ, SpineJack vertebral implant.

**Supplementary Table 1: Total Number of Levels for Each Procedure**

|              | <b>Kyphoplasty</b> | <b>Vertebroplasty</b> | <b>SpineJack</b> |
|--------------|--------------------|-----------------------|------------------|
| <b>C6</b>    | 0                  | 1                     | 0                |
| <b>T1</b>    | 1                  | 0                     | 0                |
| <b>T2</b>    | 0                  | 0                     | 0                |
| <b>T3</b>    | 3                  | 1                     | 0                |
| <b>T4</b>    | 2                  | 1                     | 0                |
| <b>T5</b>    | 2                  | 4                     | 1                |
| <b>T6</b>    | 4                  | 7                     | 5                |
| <b>T7</b>    | 13                 | 5                     | 6                |
| <b>T8</b>    | 7                  | 6                     | 8                |
| <b>T9</b>    | 7                  | 6                     | 2                |
| <b>T10</b>   | 7                  | 8                     | 9                |
| <b>T11</b>   | 9                  | 12                    | 6                |
| <b>T12</b>   | 6                  | 12                    | 15               |
| <b>L1</b>    | 11                 | 16                    | 16               |
| <b>L2</b>    | 13                 | 11                    | 11               |
| <b>L3</b>    | 10                 | 12                    | 12               |
| <b>L4</b>    | 6                  | 9                     | 9                |
| <b>L5</b>    | 12                 | 13                    | 2                |
| <b>S1</b>    | 0                  | 7                     | 0                |
| <b>S2</b>    | 0                  | 1                     | 0                |
| <b>Total</b> | <b>113</b>         | <b>132</b>            | <b>102</b>       |
